# Supplementary material
Source: PubMed Central journal article supplement (PMC6778406)
Supplement: NIHMS1052797-supplement-Supporting_Information.pdf [file NIHMS1052797-supplement-Supporting_Information.pdf]

# SUPPORTING INFORMATION

for

## Poly(propylacrylic acid)-Peptide Nanoplexes as a Platform for Enhancing the Immunogenicity of Neoantigen Cancer Vaccines

*Feng Qiu<sup>1,2,^</sup>, Kyle W. Becker<sup>1,^</sup>, Frances C. Knight<sup>3</sup>, Jessalyn J. Baljon<sup>3</sup>, Sema Sevimli<sup>1</sup>,  
Daniel Shae<sup>1</sup>, Pavlo Gilchuk<sup>4,5</sup>, Sebastian Joyce<sup>4,5</sup>, and John T. Wilson<sup>1,3,6,\*</sup>*

<sup>1</sup>Department of Chemical and Biomolecular Engineering; Vanderbilt University  
Nashville, TN 37235, USA

<sup>2</sup>Laboratory of Anaesthesia and Critical Care Medicine; Translational Neuroscience  
Center; West China Hospital, Sichuan University, Chengdu, 610041, China

<sup>3</sup>Department of Biomedical Engineering; Vanderbilt University

<sup>4</sup>Department of Pathology, Microbiology and Immunology; School of Medicine;  
Vanderbilt University

<sup>5</sup>Department of Veterans Administration Tennessee Valley Healthcare System

<sup>6</sup>Vanderbilt-Ingram Cancer Center; Vanderbilt University Medical Center

<sup>^</sup>These authors contributed equally to this work

<sup>\*</sup>CORRESPONDING AUTHOR. John T. Wilson; Tel: +1-615-322-6406; e-mail:  
john.t.wilson@vanderbilt.edu

Supporting Data:

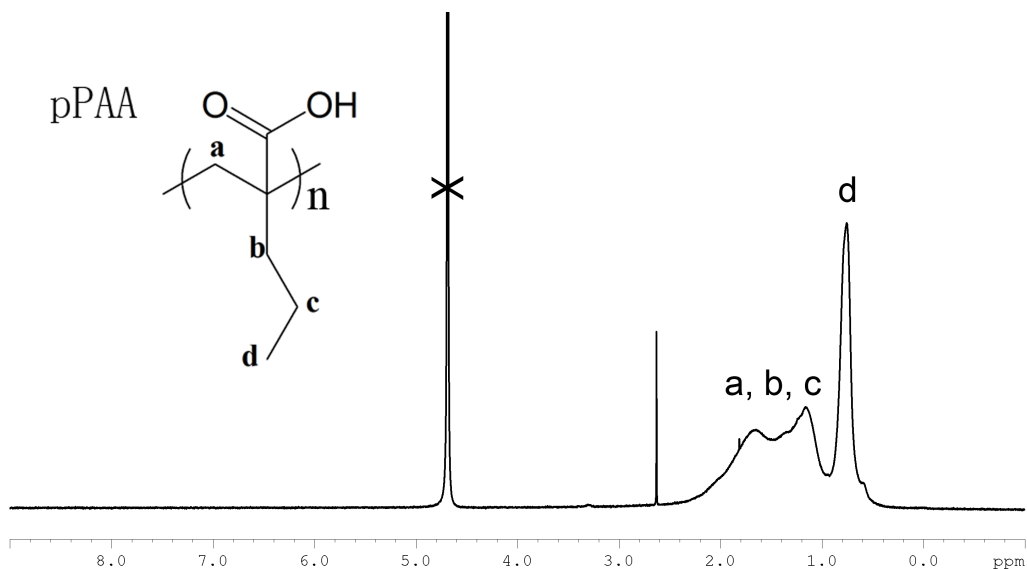

Figure S1: <sup>1</sup>H NMR spectrum of purified poly(propylacrylic acid) (pPAA) in DMSO-d<sub>6</sub>.

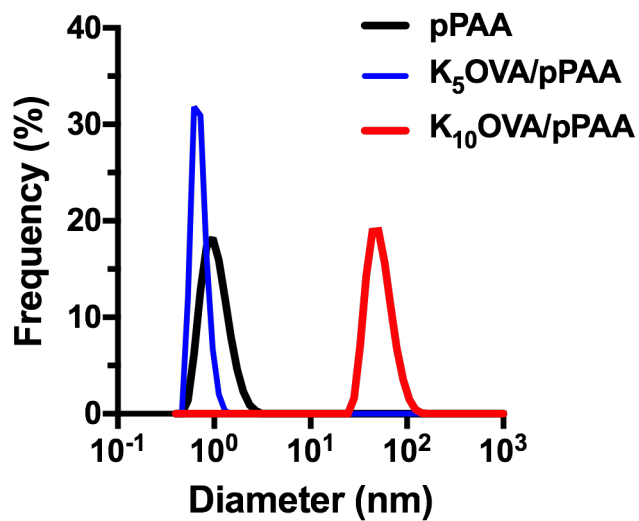

Figure S2: Representative size distribution (volume average) measured by DLS of soluble pPAA and complexes of pPAA with K<sub>5</sub>OVA or K<sub>10</sub>OVA at a 2:1 COOH:NH<sub>2</sub> ratio.

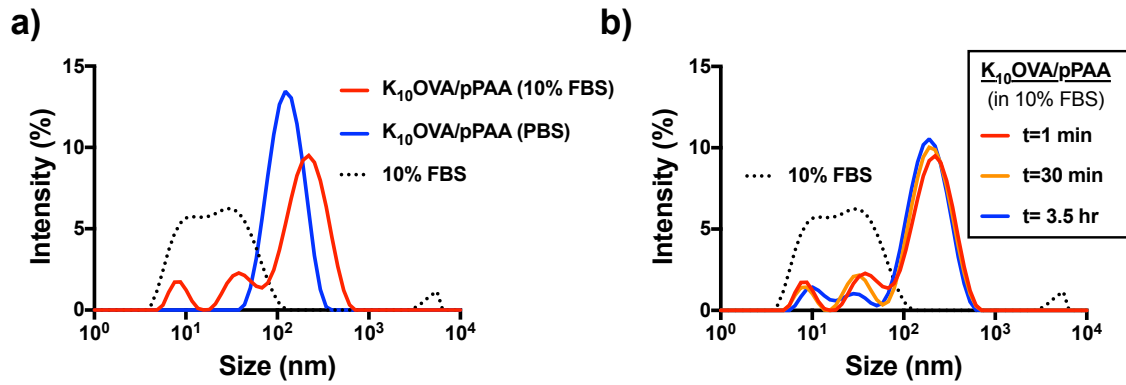

**Figure S3:** Dynamic light scattering (DLS) analysis of particle size distribution of nanoplexes in PBS containing 10% serum. **(a)** DLS analysis of  $K_{10}OVA/pPAA$  nanoplexes in PBS or 10% serum (FBS). **(b)** DLS analysis of  $K_{10}OVA/pPAA$  nanoplexes in 10% serum at 1 min, 30 min, or 3.5 hours.

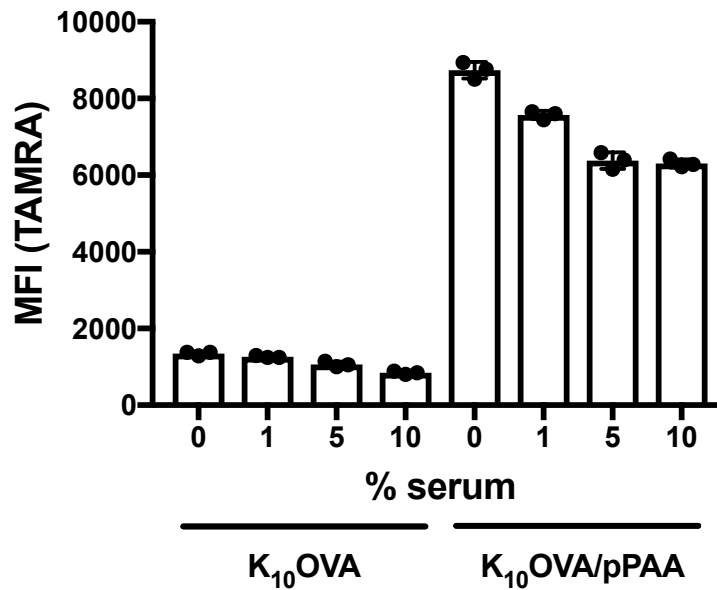

**Figure S4:** Effect of the percentage of serum (fetal bovine serum) in culture media on intracellular uptake of TAMRA-labeled  $K_{10}OVA$  or  $K_{10}OVA/pPAA$  nanoplexes by DC2.4 cells.

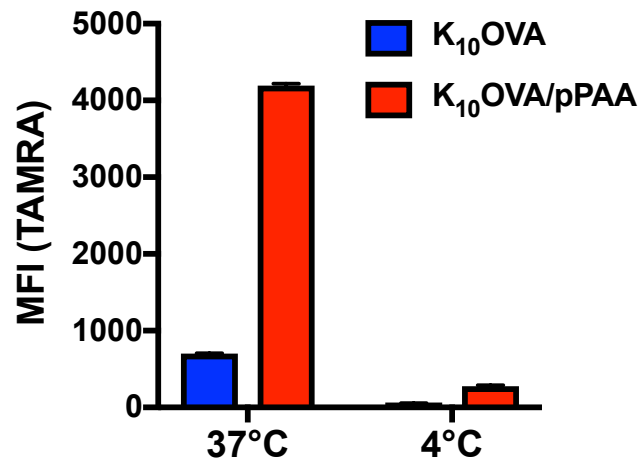

**Figure S5:** Median fluorescent intensity (MFI) values of DC2.4 cells incubated with TAMRA-labeled K<sub>10</sub>OVA or K<sub>10</sub>OVA/pPAA nanoplexes for 4h at 37°C or 4°C.

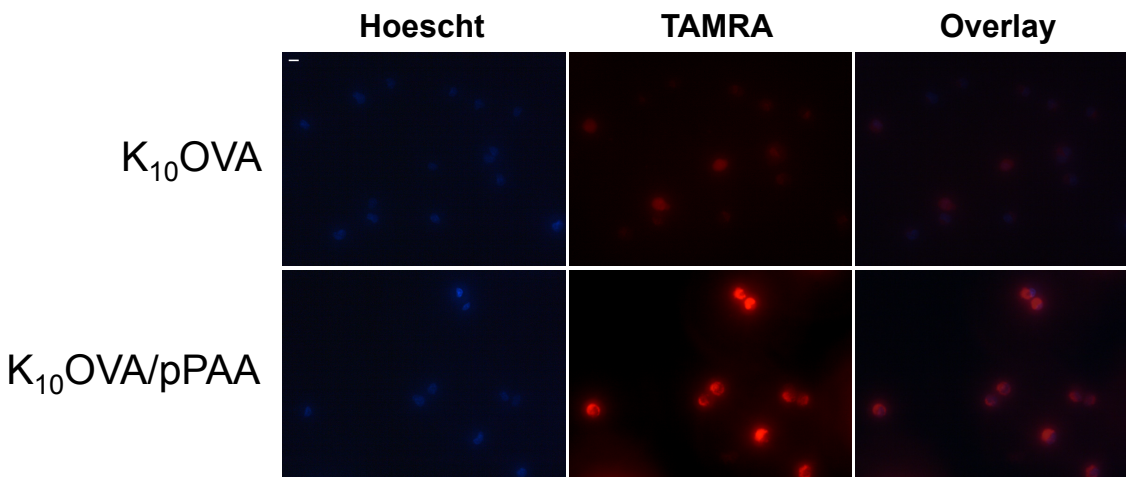

**Figure S6:** Representative fluorescent micrographs of DC2.4 cells incubated with TAMRA-labeled K<sub>10</sub>OVA or K<sub>10</sub>OVA/pPAA nanoplexes for 4h prior to washing and imaging. Scale bar (top left) = 10 μm.

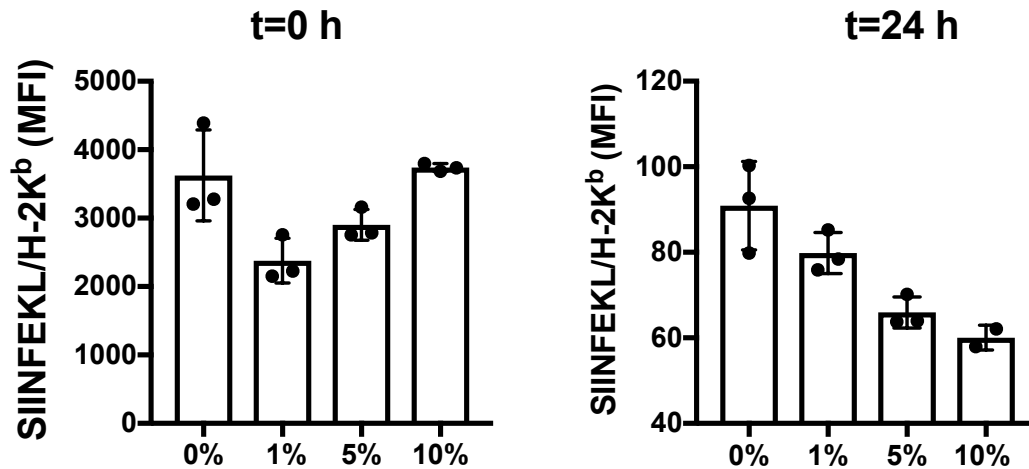

**Figure S7:** Effect of the percentage of serum (fetal bovine serum) in culture media on MHC-I (H-2K<sup>b</sup>) SIINFEKL presentation after 4 h incubation with K<sub>10</sub>OVA/pPAA polyplexes at 10 μM peptide, followed by washing, culture for 0 h or 24 h, and staining with an antibody (25-D1.16) specific to the SIINFEKL/H-2K<sup>b</sup> complex. Note that measurements for t=0 and t= 24 h were collected using two different flow cytometers and therefore MFI values between time points cannot be directly compared.

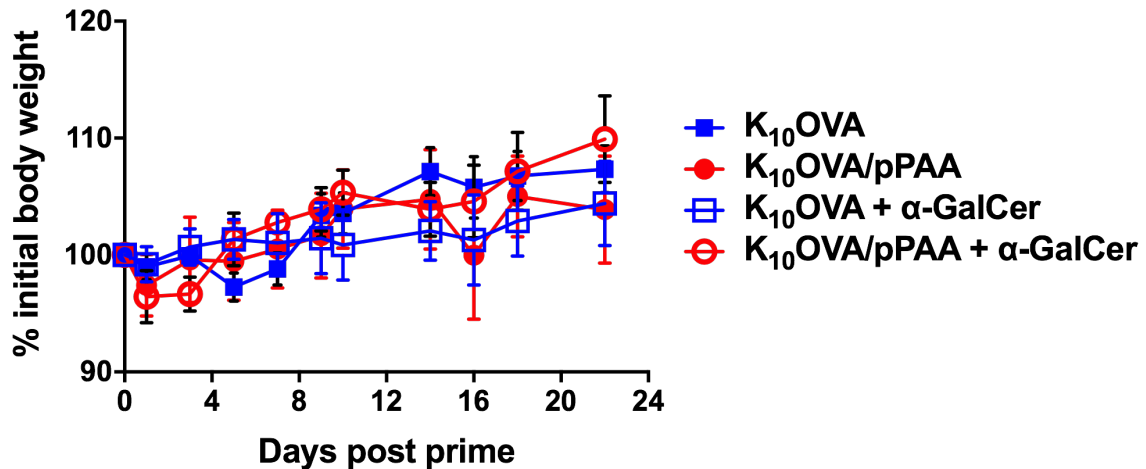

**Figure S8:** Change in relative body weight of mice immunized intranasally with the indicated formulation on d0 and d14.

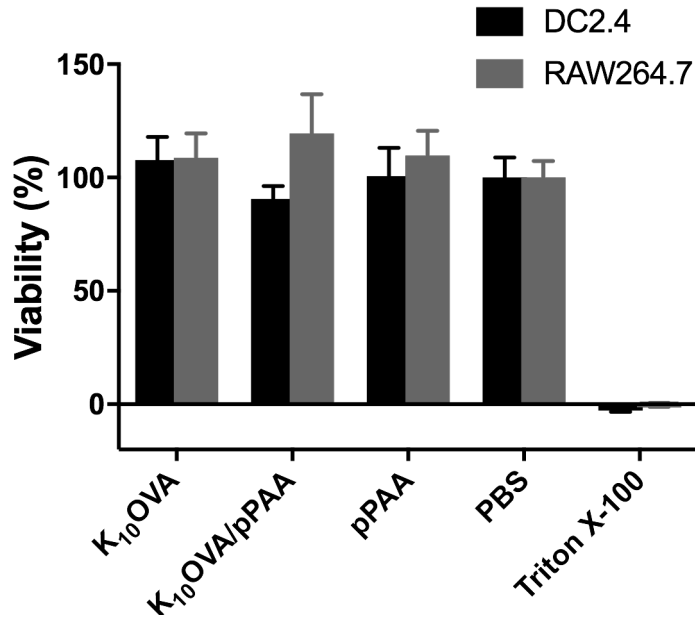

**Figure S9:** Viability of DC2.4 dendritic cells and RAW264.7 macrophages after 24 h incubation with indicated treatment group.

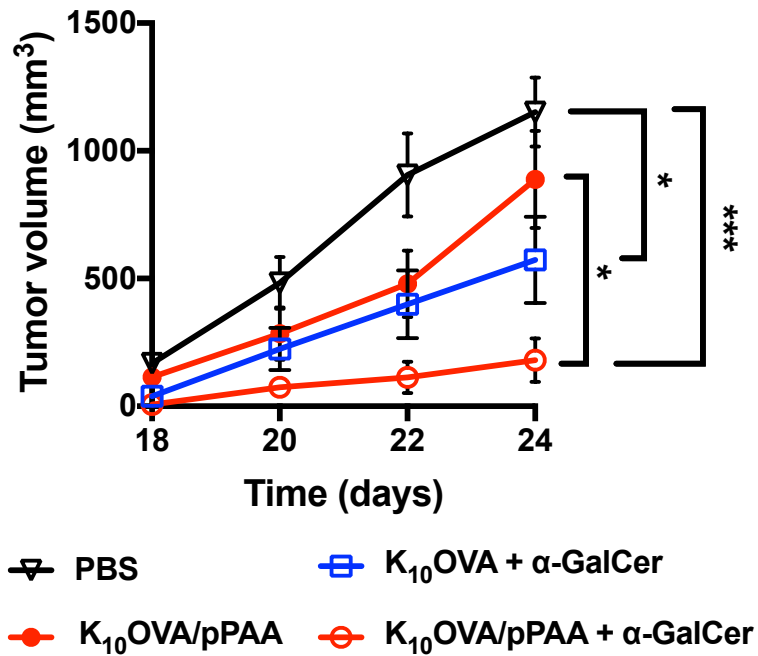

**Figure S10:** Mice were inoculated with B16-OVA cells subcutaneously (SC) 3 days prior to IN administration of indicated formulations. Mean ( $\pm$  SEM) tumor volume ( $n=4-8$  mice/per group) is shown. \* $p < 0.05$ , \*\*\* $p < 0.005$  by one-way ANOVA with Tukey post-hoc test on day 24.
